# Supplementary material for: Impact of Bundle Branch Block on Permanent Pacemaker Implantation after Transcatheter Aortic Valve Implantation: A Meta-Analysis
Source: MDPI journal article supplement (doi:10.3390/jcm10122719), 2021-06-19

## Supplementary Materials

**Figure S1.** Flowsheet of the included studies

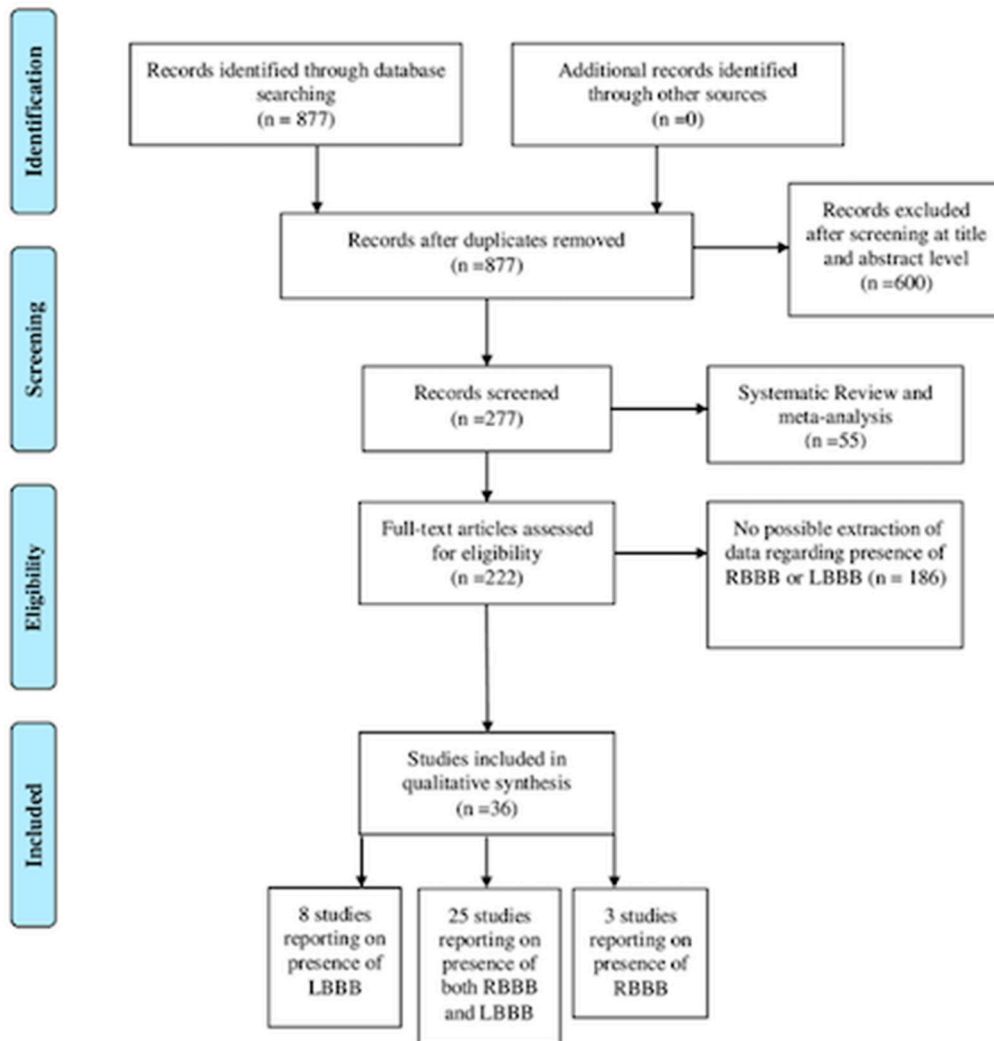

**Figure S2.** Forest plot pooling the proportion of LBBB in 33 studies.

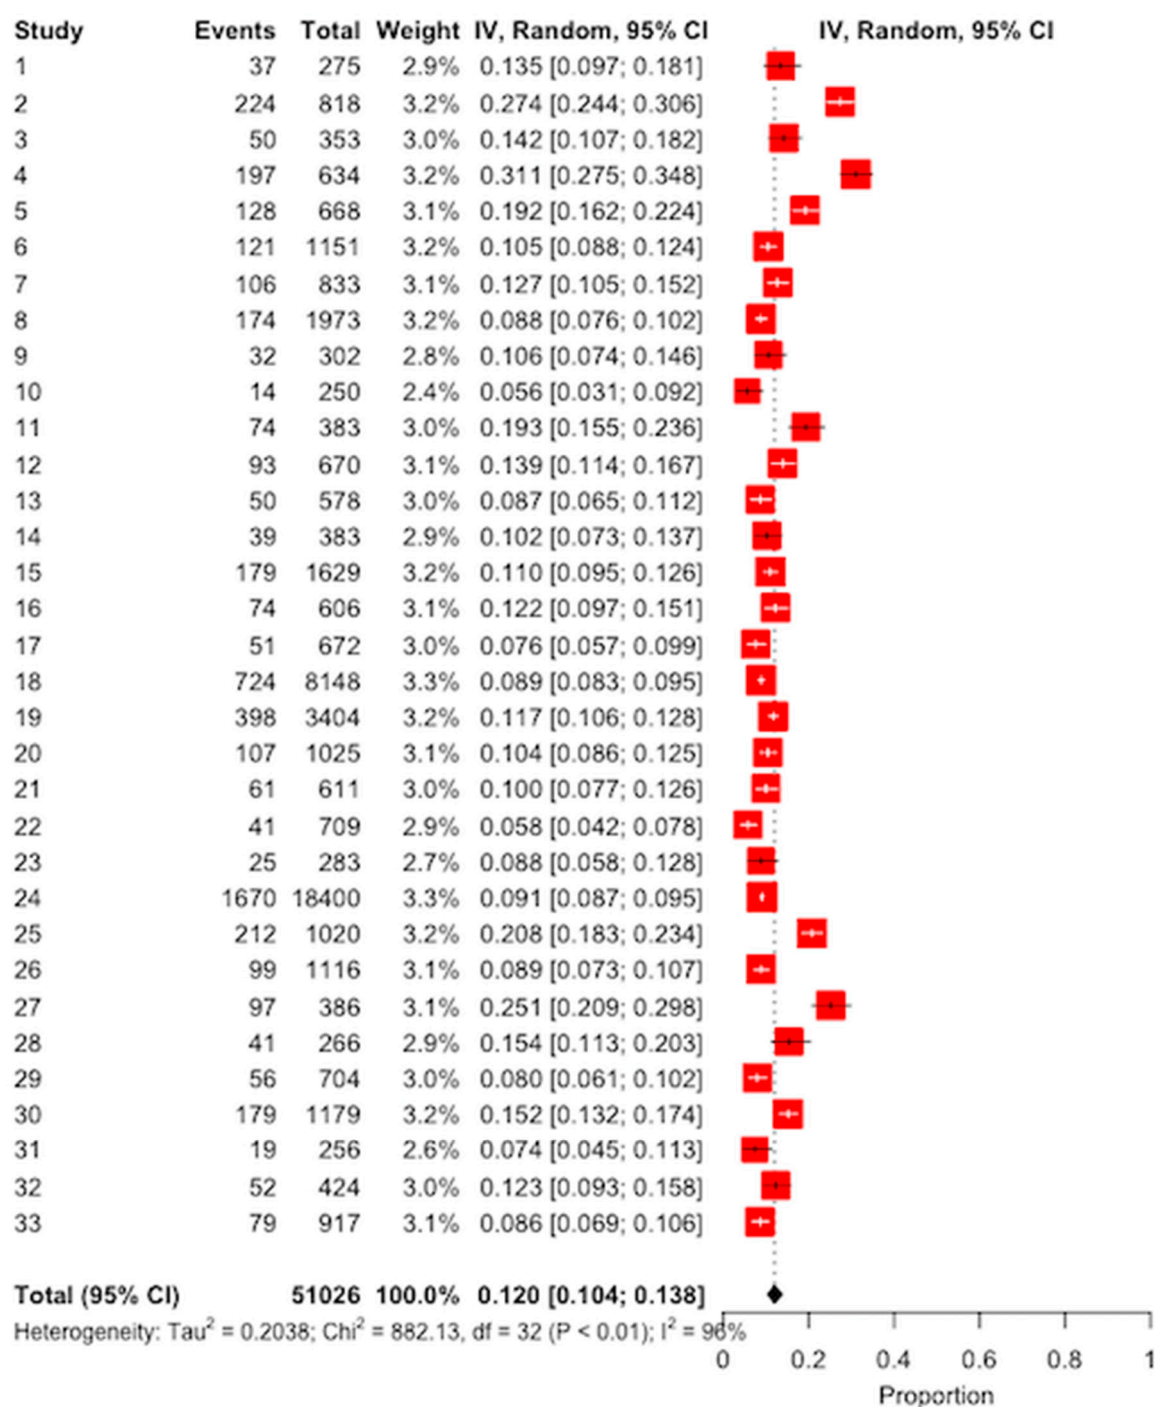

**Figure S3.** Forest plot pooling the proportion of LBBB in subset of 7 315 patients with post-TAVI PPI.

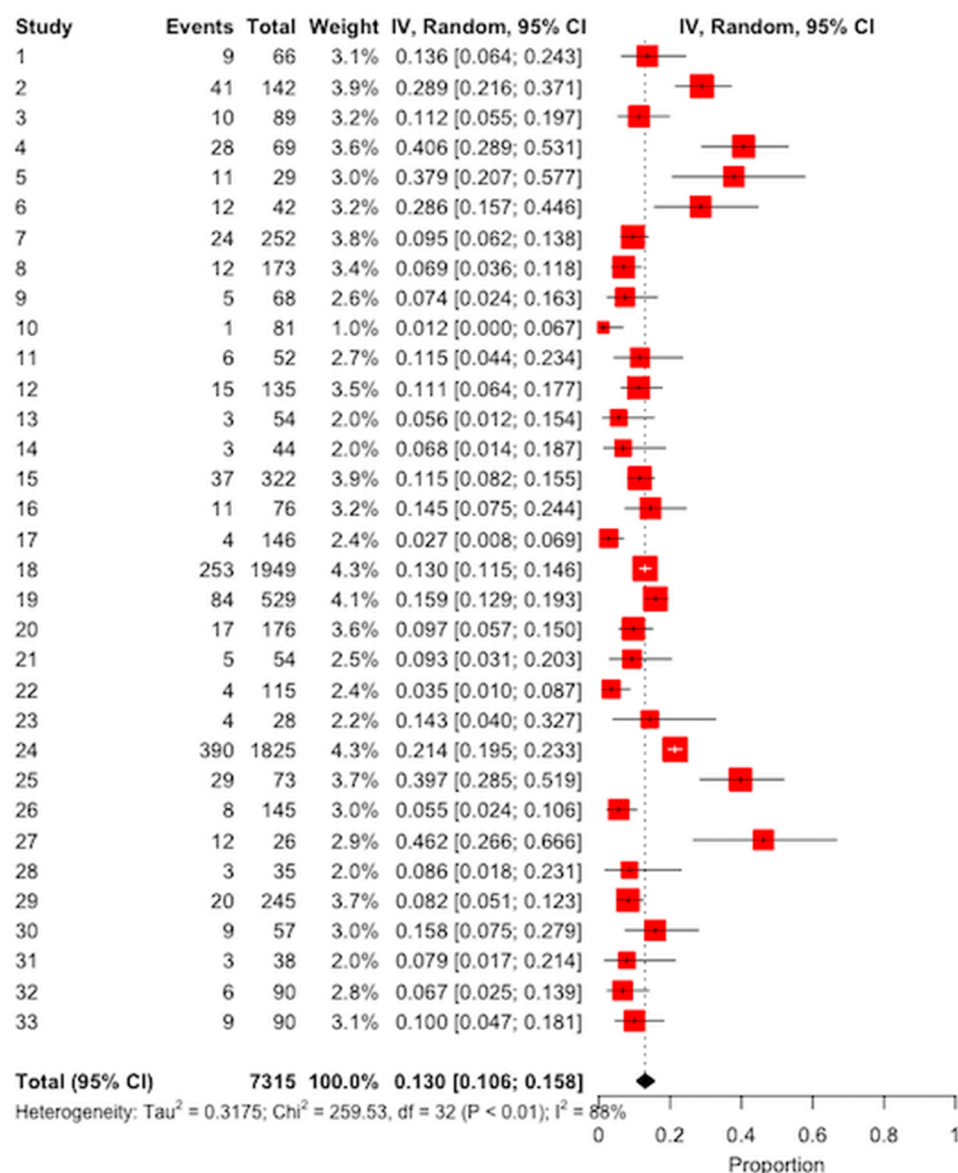

**Figure S4.** Forest plot pooling the proportion of LBBB in subset of 43 650 patients without post-TAVI PPI.

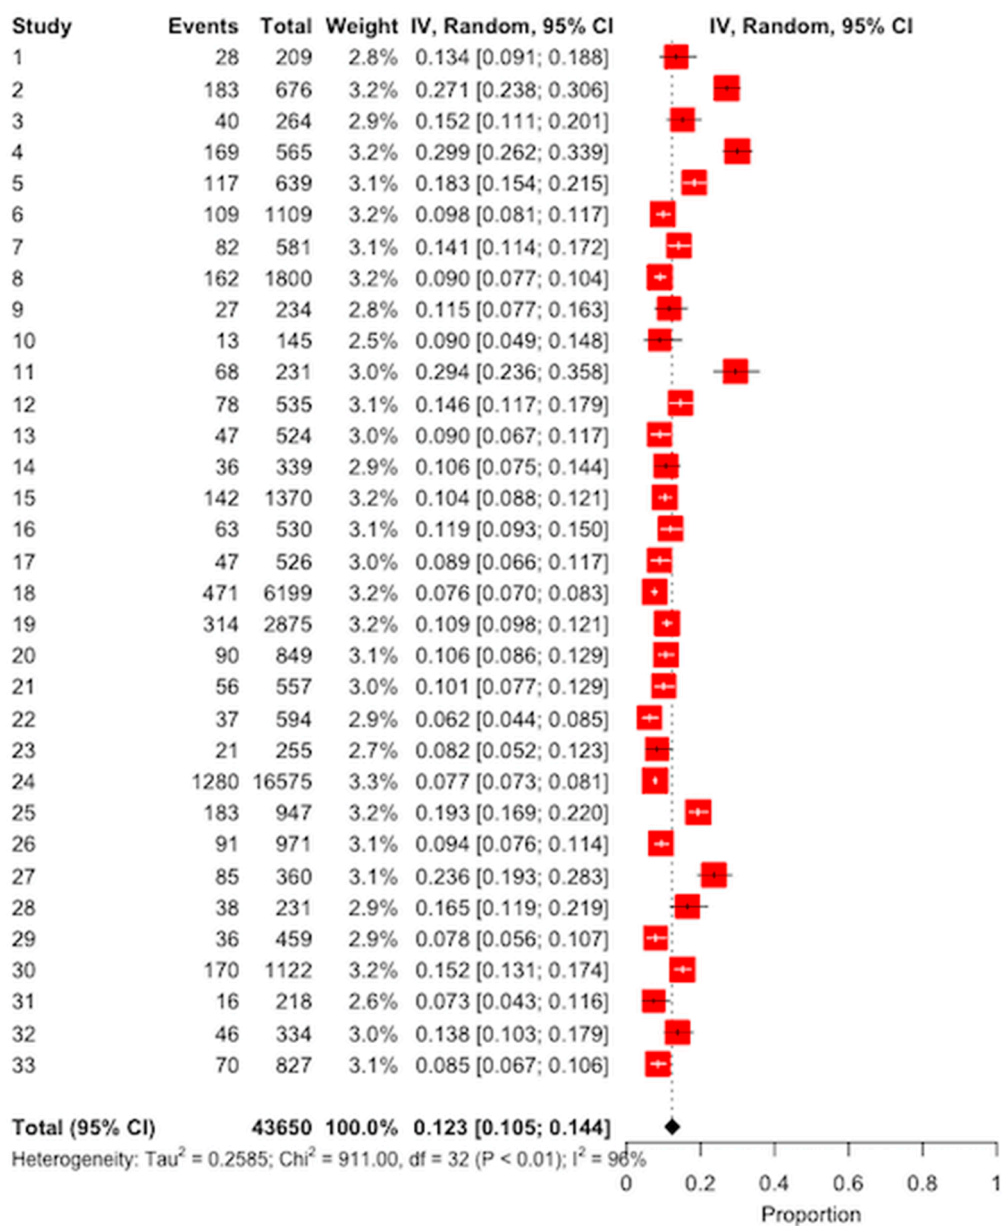

**Figure S5.** Baujat plot: impact of the studies on overall heterogeneity in studies reporting on LBBB status.

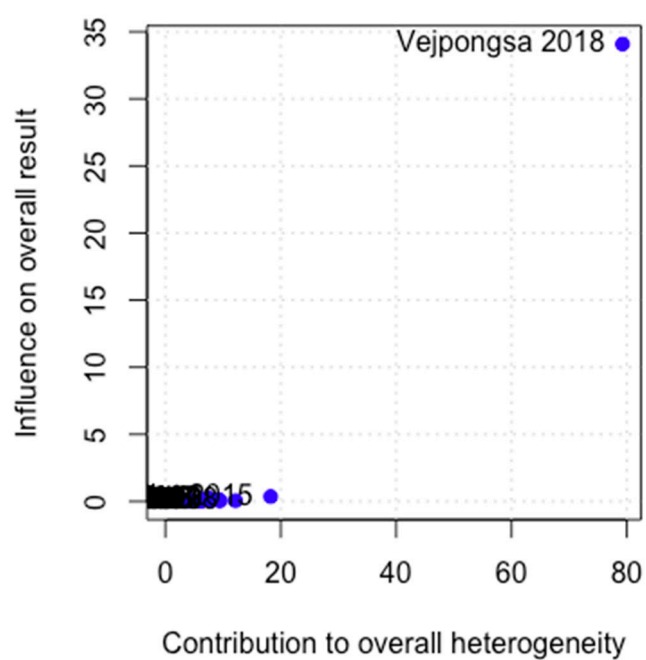

**Figure S6.** Bubble plots: influence of age on risk for post-TAVI PPI in patients with LBBB.

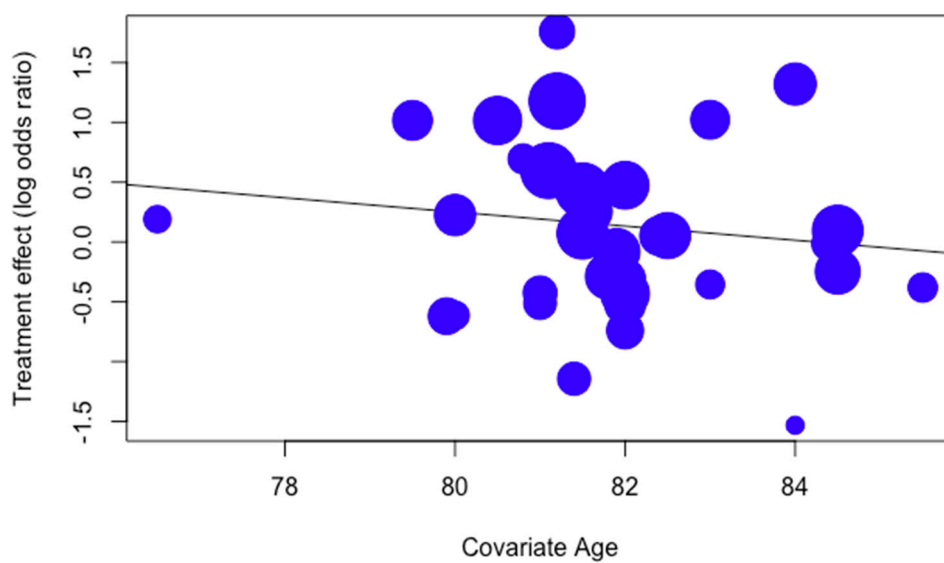

**Figure S7.** Bubble plots: influence of LVEF on risk for post-TAVI PPI in patients with LBBB

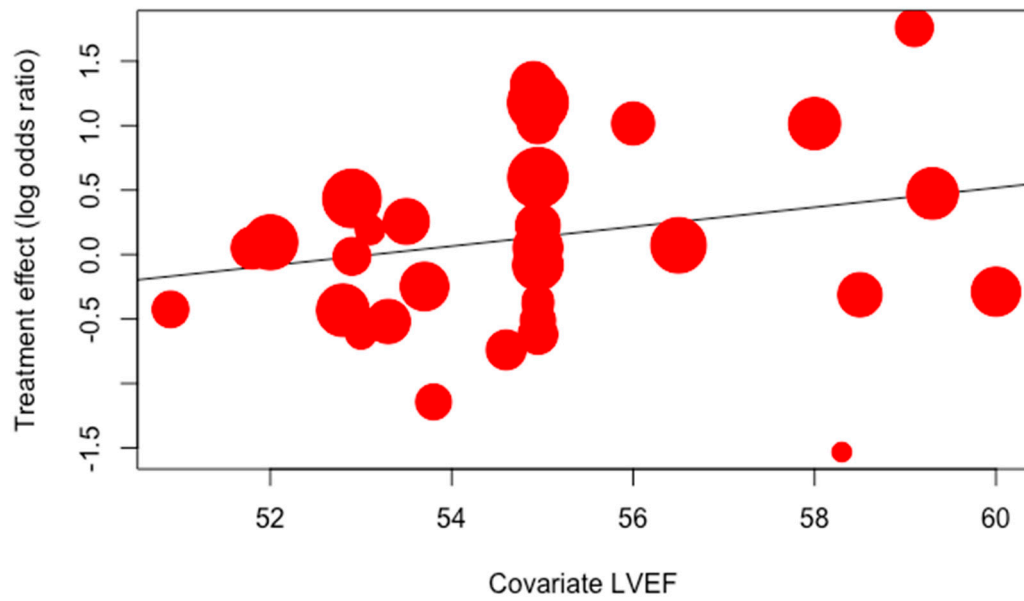

**Figure S8.** Bubble plots: influence of the year of the study on risk for post-TAVI PPI in patients with LBBB.

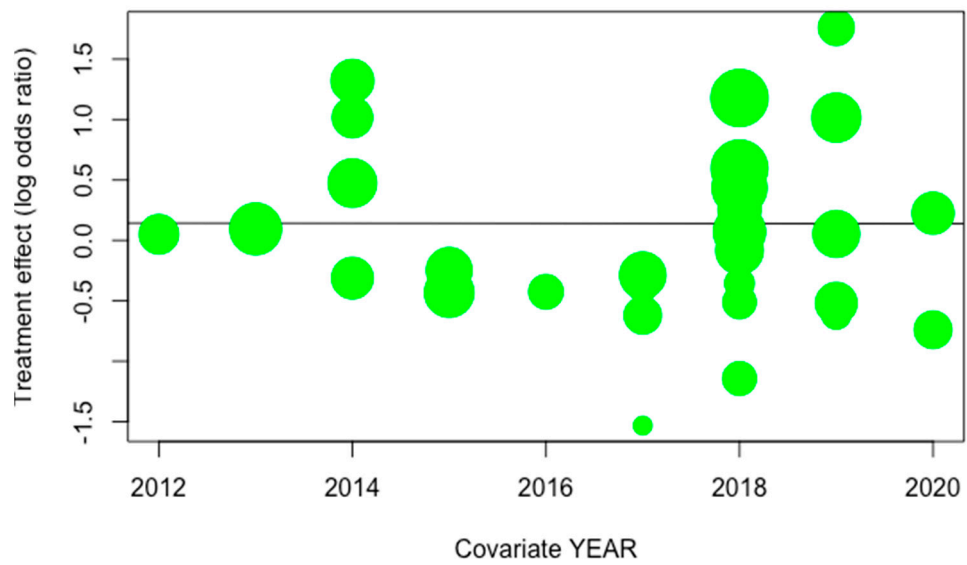

**Figure S9.** Forest plot pooling the proportion of RBBB in 28 studies.

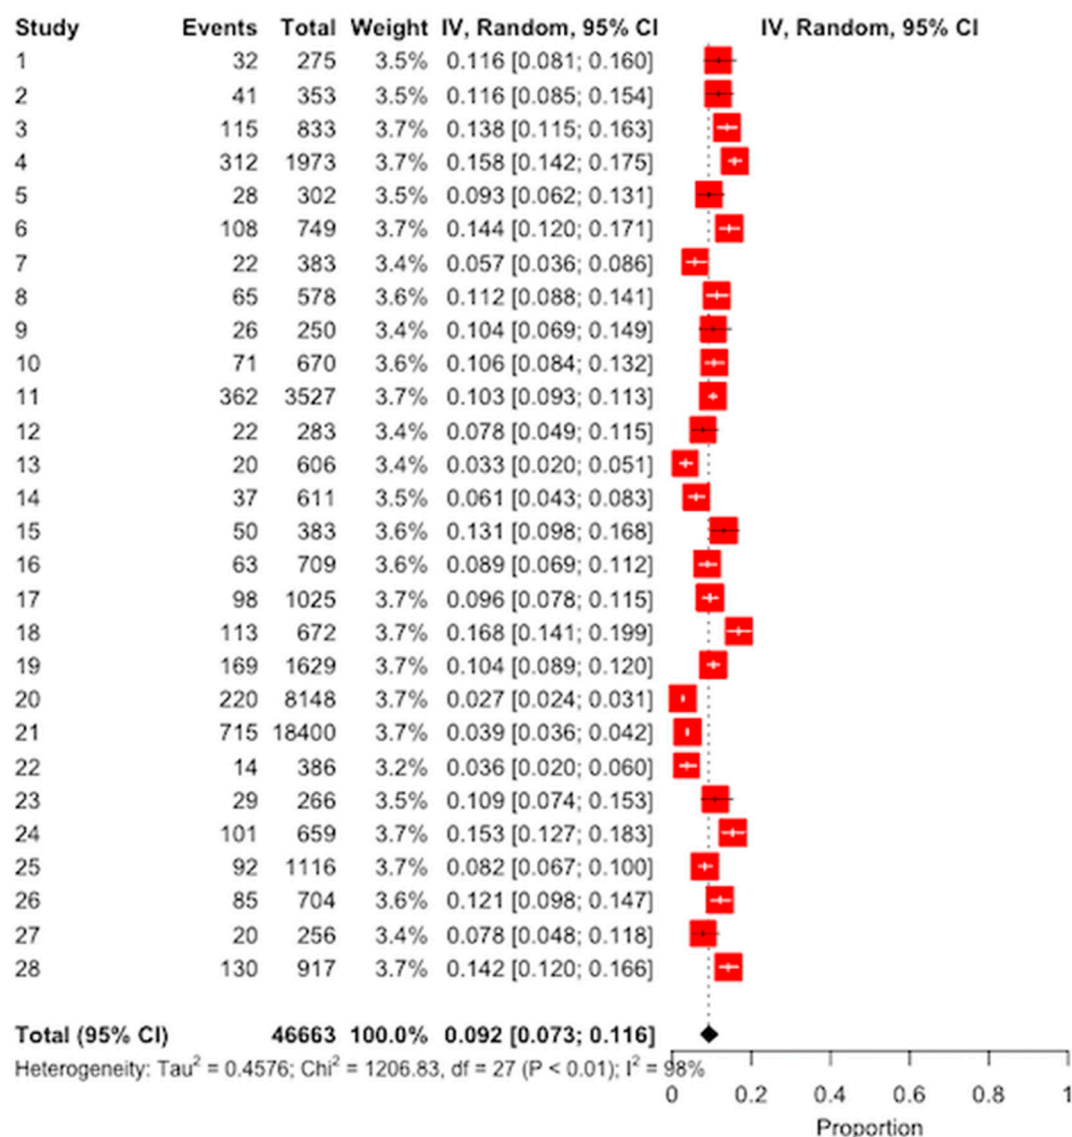



**Figure S10.** Forest plot pooling the proportion of RBBB in subset of 6 932 patients with post-TAVI PPI

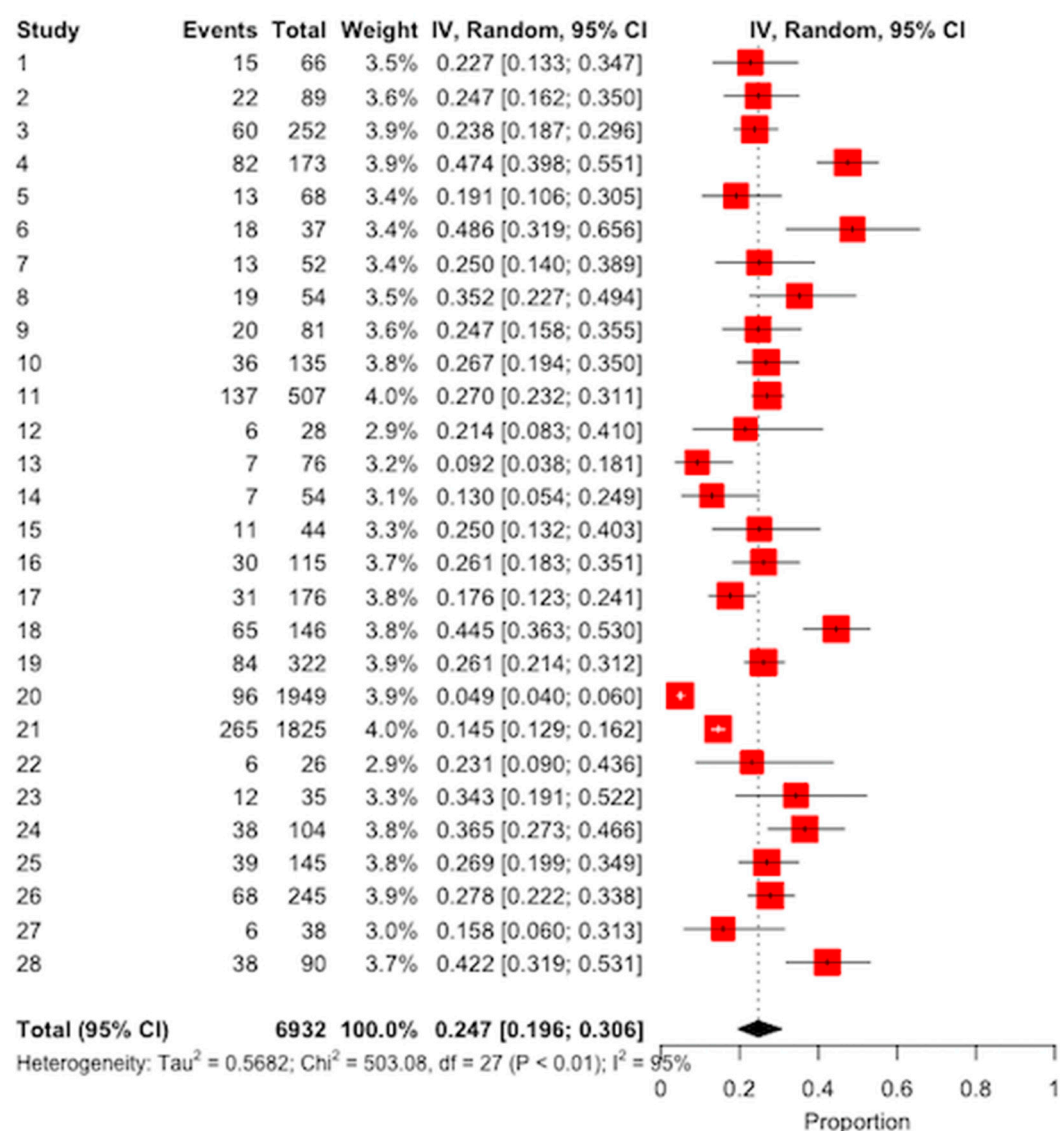



**Figure S11.** Forest plot pooling the proportion of RBBB in subset of 39 670 patients without post-TAVI PPI

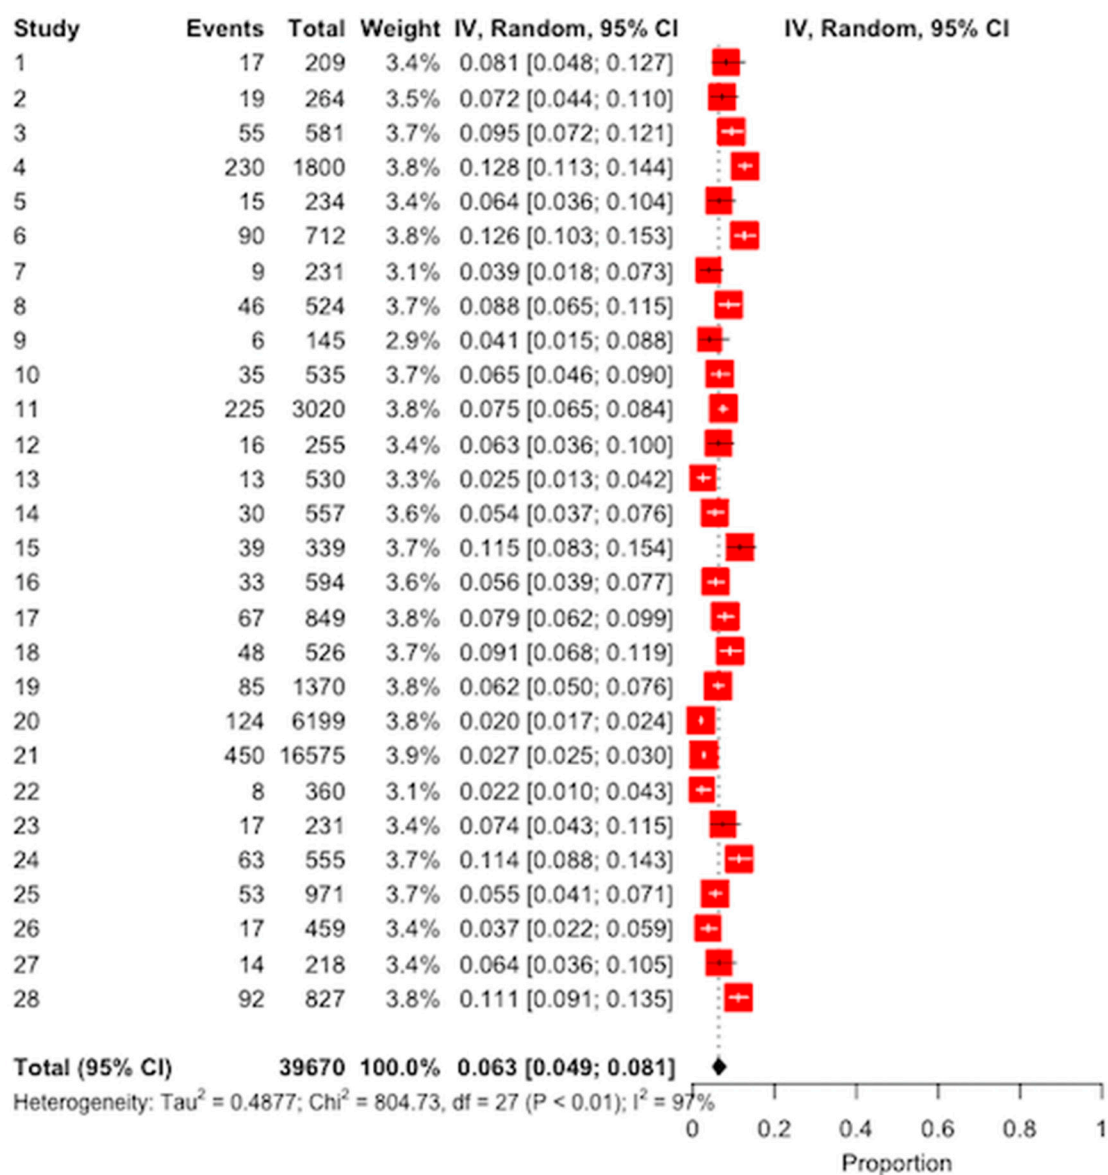

**Figure S12.** Baujat plot: impact of the studies on overall heterogeneity in studies reporting on RBBB status.

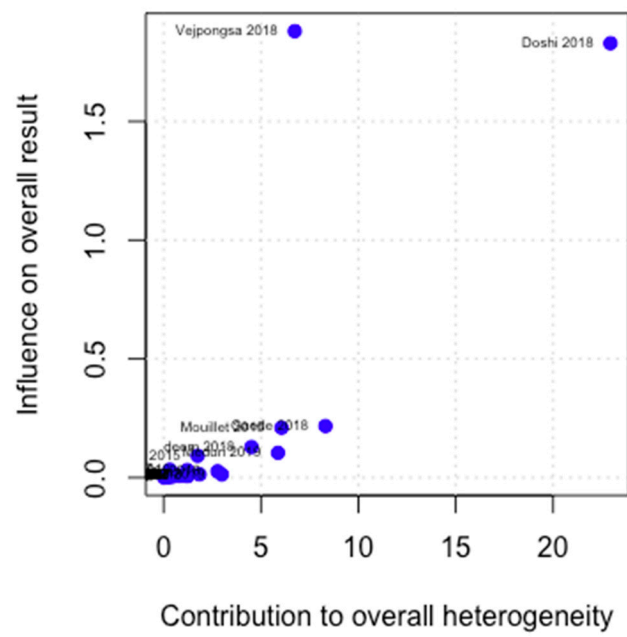

**Figure S13.** Bubble plots: influence of age on risk for post-TAVI PPI in patients with RBBB.

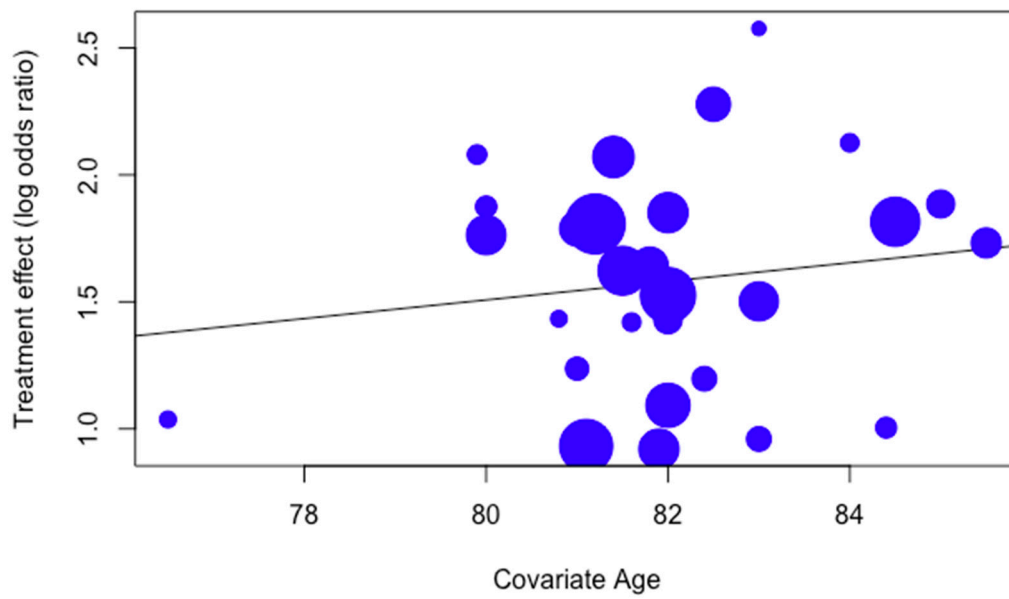

**Figure S14.** Bubble plots: influence of LVEF on risk for post-TAVI PPI in patients with RBBB

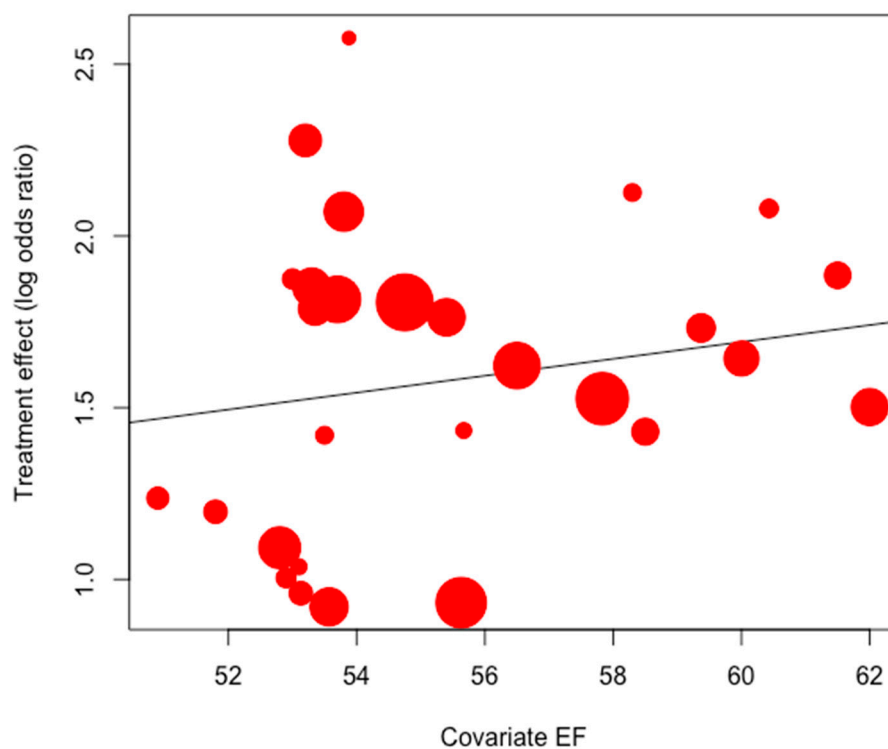

**Figure S15.** Bubble plots: influence of the year of the study on risk for post-TAVI PPI in patients with RBBB.

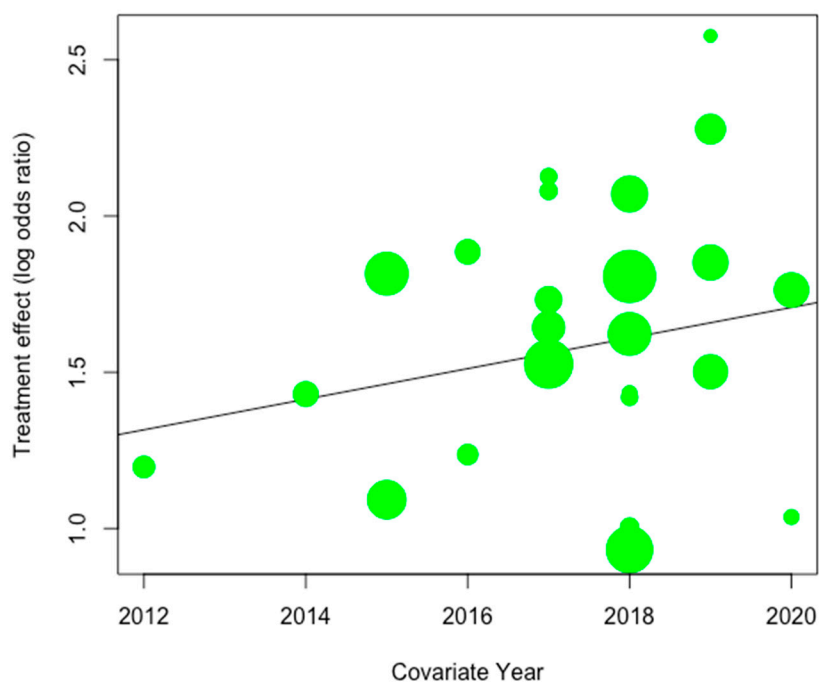

Supplement: s1 [file s1]
